# Supplementary material for: Direct Evidence for Packaging Signal-Mediated Assembly of Bacteriophage MS2
Source: PubMed Central journal article supplement (PMC4751978; doi:10.1016/j.jmb.2015.11.014), 2016-01-29
Supplement: mmc1.pdf [file mmc1.pdf]

## SUPPLEMENTARY RESULTS

**Supplementary Table 1.** Summary of peptides derived from the MS2 MP that were cross-linked to the MS2 genomic RNA.

| Peptide Residues | Trypsin | Trypsin + Glu-C |
|------------------|---------|-----------------|
| 1-25             |         |                 |
| 26-34            |         | +               |
| 35-50            |         |                 |
| 51-52            | +       |                 |
| 53-62            | ++      | +               |
| 63-77            | +       |                 |
| 78-115           |         |                 |
| 116-131          |         | +               |
| 132-162          | +       | +               |
| 163-169          | +       | +               |
| 170-177          | ++      | ++              |
| 178-184          | +       | +               |
| 185-190          | +       | ++              |
| 191-198          |         | ++              |
| 199-209          |         | +               |
| 210-219          |         | +               |
| 220-224          |         |                 |
| 225-232          |         | +               |
| 233-243          |         |                 |
| 244-260          |         |                 |
| 260-393          |         |                 |

**Supplementary Table 2.** Summary of data from Illumina DNA sequencing of cDNAs derived from RNAs bound to the MS2 CP.

| Library        | Mapped Reads F. | Average Coverage | Mapped Reads R. | Average Coverage R. | Total Mapped Reads | Total Avg. Coverage |
|----------------|-----------------|------------------|-----------------|---------------------|--------------------|---------------------|
| MS2, naked RNA | 540,942         | 3834             | 607,844         | 9,028               | 1,148,786          | 12862               |
| MS2, UV 0x CP  | 29,157          | 211              | 30,293          | 645                 | 59,450             | 856                 |
| MS2, UV 3x CP  | 390,988         | 2820             | 440,087         | 7843                | 831,075            | 10667               |

Mapped reads F/R define the number of forward/reverse reads, respectively, present in the DNA sequencing run that corresponded to MS2 genome. "Coverage" is the number of sequence matches to the MS2 genome in the NextGen data.
